# Supplementary material for: Linkage Analysis and Map Construction in Genetic Populations of Clonal F1 and Double Cross
Source: PubMed Central journal article supplement (PMC4349096; doi:10.1534/g3.114.016022), 2015-01-15
Supplement: supp_g3.114.016022_FigureS1.pdf [file supp_g3.114.016022_FigureS1.pdf]

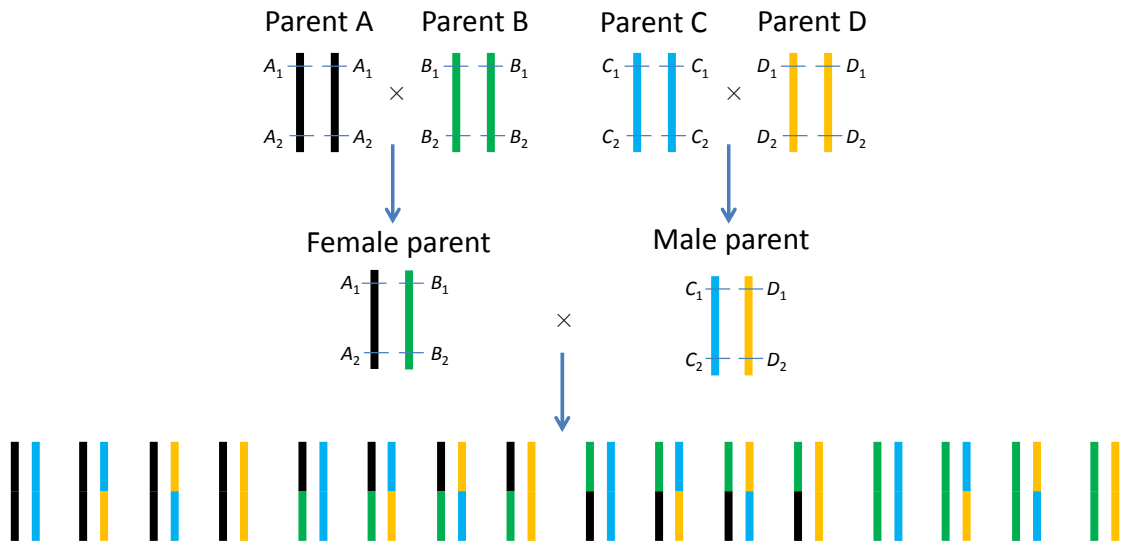

**Figure S1** Diagram of the development of a double cross population from four inbred lines A, B, C, and D, which are highly homozygous at most loci. Assuming locus 1 and locus 2 were two linked polymorphism markers.  $A_1$ - $D_1$  were the four alleles at marker locus 1.  $A_2$ - $D_2$  were the four alleles at marker locus 2. Linkage phases in the two single crosses were known when the four inbred lines were genotyped.
