# Supplementary material for: Linkage Analysis and Map Construction in Genetic Populations of Clonal F1 and Double Cross
Source: PubMed Central journal article supplement (PMC4349096; doi:10.1534/g3.114.016022), 2015-01-15
Supplement: supp_g3.114.016022_FigureS3.pdf [file supp_g3.114.016022_FigureS3.pdf]

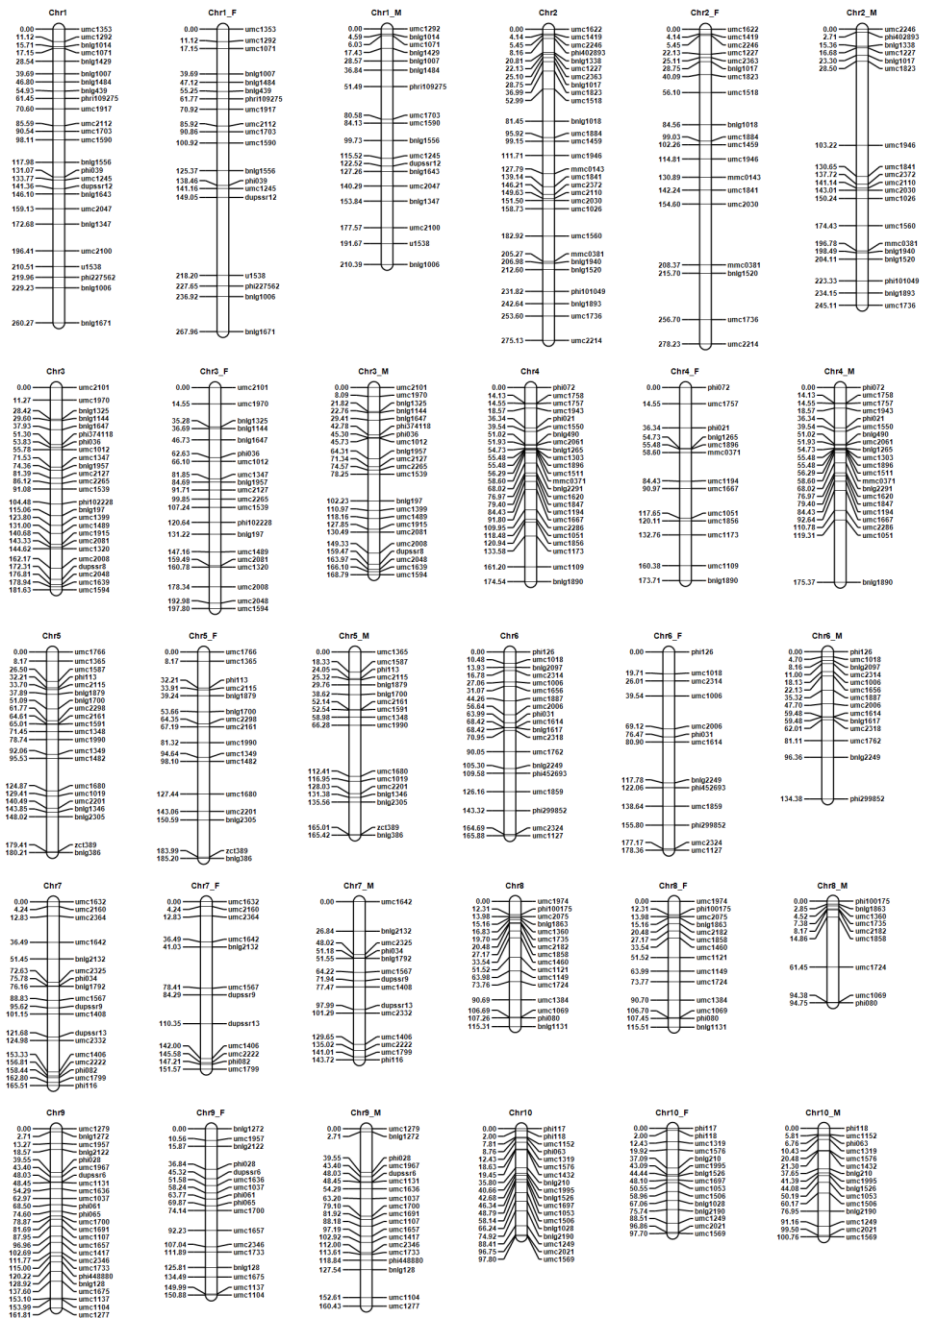

**Figure S3** Combined, female, and male linkage maps of ten chromosomes in the actual maize population. Kosambi mapping function was used to convert recombination frequency to genetic distance.
