# Supplementary material for: Linkage Analysis and Map Construction in Genetic Populations of Clonal F1 and Double Cross
Source: PubMed Central journal article supplement (PMC4349096; doi:10.1534/g3.114.016022), 2015-01-15
Supplement: supp_g3.114.016022_FigureS4.pdf [file supp_g3.114.016022_FigureS4.pdf]

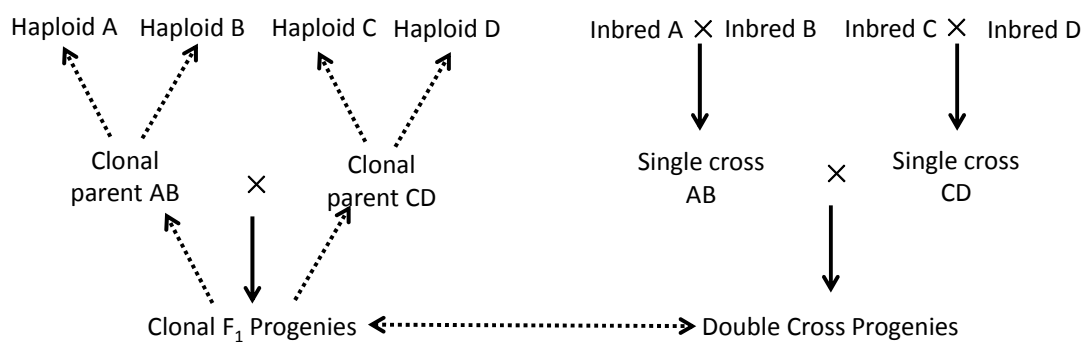

**Figure S4** Schematic representation on the difference and similarity between clonal F<sub>1</sub> and double cross. In clonal F<sub>1</sub>, the cross was made between two heterozygous parents. In double cross, the four parents were existing homozygous inbred lines. Two F<sub>1</sub> hybrids were firstly made from the four parents, and then the double cross was derived from the two F<sub>1</sub> hybrids. Solid arrows represent the derivative relationship in practice. In clonal F<sub>1</sub>, haploids of the two parents can be built from the genetic analysis in its progenies, after which four virtual homozygous inbred lines may be determined. Dashed arrows stand for procedure where the four virtual lines were derived.
