# Supplementary material for: Linkage Analysis and Map Construction in Genetic Populations of Clonal F1 and Double Cross
Source: PubMed Central journal article supplement (PMC4349096; doi:10.1534/g3.114.016022), 2015-01-15
Supplement: supp_g3.114.016022_FileS2.pdf [file supp_g3.114.016022_FileS2.pdf]

File S2

**Likelihood function, first and second order derivatives of the logarithm likelihood in estimating  $r$  in Scenario 9 for linkage phase I and IV in clonal F1 progenies**

For linkage phase I, the likelihood function and logarithm likelihood were given in Eq. S17 and S18, respectively.

$$L = \frac{n!}{n_1! \cdots n_9!} \left[ \frac{1}{4} (1-r)^2 \right]^{n_1+n_9} \left[ \frac{1}{2} r(1-r) \right]^{n_2+n_4+n_6+n_8} \left[ \frac{1}{4} r^2 \right]^{n_3+n_7} \left[ \frac{1}{2} (1-2r+2r^2) \right]^{n_5} \quad (S17)$$

$$\log L = C + (2n_1 + n_2 + n_4 + n_6 + n_8 + 2n_9) \log(1-r) + (n_2 + 2n_3 + n_4 + n_6 + 2n_7 + n_8) \log r + n_5 \log(1-2r+2r^2) \quad (S18)$$

where  $n_1$ - $n_9$  were observed sample sizes of the nine genotypes.

The first derivative  $f'(r)$  and the second derivative  $f''(r)$  were given in Eq. S19 and S20,

respectively.

$$f'(r) = \frac{d \ln L}{dr} = \frac{n_2 + 2n_3 + n_4 + n_6 + 2n_7 + n_8}{r} - \frac{2n_1 + n_2 + n_4 + n_6 + n_8 + 2n_9}{1-r} + \frac{4r-2}{1-2r+2r^2} n_5 \quad (S19)$$

$$f''(r) = \frac{d^2 \ln L}{d^2 r} = -\frac{n_2 + 2n_3 + n_4 + n_6 + 2n_7 + n_8}{r^2} - \frac{2n_1 + n_2 + n_4 + n_6 + n_8 + 2n_9}{(1-r)^2} + \frac{8r(1-r)}{(1-2r+2r^2)^2} n_5 \quad (S20)$$

For linkage phase IV, the likelihood function and logarithm likelihood were given in Eq. S21 and S22,

respectively.

$$L = \frac{n!}{n_1! \cdots n_9!} \left[ \frac{1}{4} (1-r)^2 \right]^{n_3+n_7} \left[ \frac{1}{2} r(1-r) \right]^{n_2+n_4+n_6+n_8} \left[ \frac{1}{4} r^2 \right]^{n_1+n_9} \left[ \frac{1}{2} (1-2r+2r^2) \right]^{n_5} \quad (S21)$$

$$\log L = C + (n_2 + 2n_3 + n_4 + n_6 + 2n_7 + n_8) \log(1-r) +$$

$$(2n_1 + n_2 + n_4 + n_6 + n_8 + 2n_9) \log r + n_5 \log(1-2r+2r^2) \quad (\text{S22})$$

The first derivative  $f'(r)$  and the second derivative  $f''(r)$  were given in Eq. S23 and S24, respectively.

$$f'(r) = \frac{d \ln L}{dr} = \frac{2n_1 + n_2 + n_4 + n_6 + n_8 + 2n_9}{r} -$$

$$\frac{n_2 + 2n_3 + n_4 + n_6 + 2n_7 + n_8}{1-r} + \frac{4r-2}{1-2r+2r^2} n_5 \quad (\text{S23})$$

$$f''(r) = \frac{d^2 \ln L}{d^2 r} = -\frac{2n_1 + n_2 + n_4 + n_6 + n_8 + 2n_9}{r^2} -$$

$$\frac{n_2 + 2n_3 + n_4 + n_6 + 2n_7 + n_8}{(1-r)^2} + \frac{8r(1-r)}{(1-2r+2r^2)^2} n_5 \quad (\text{S24})$$
