# Supplementary material for: Linkage Analysis and Map Construction in Genetic Populations of Clonal F1 and Double Cross
Source: PubMed Central journal article supplement (PMC4349096; doi:10.1534/g3.114.016022), 2015-01-15
Supplement: supp_g3.114.016022_TableS1.pdf [file supp_g3.114.016022_TableS1.pdf]

**Table S1 Female and male gametes and their frequencies, and frequencies of their F<sub>1</sub> progenies.** Assuming four alleles can be clearly identified at each of the two linked loci. Genotypes of the female and male parents are  $A_1A_2/B_1B_2$  and  $C_1D_2/C_1D_2$ , respectively. Recombination frequencies in the female and male parents are denoted as  $r_F$  and  $r_M$ , respectively.

| Gamete and its frequency from the female F <sub>1</sub> | Gamete and its frequency from the male F <sub>1</sub> |                          |                          |                              |
|---------------------------------------------------------|-------------------------------------------------------|--------------------------|--------------------------|------------------------------|
|                                                         | $C_1C_2, \frac{1}{2}(1-r_M)$                          | $C_1D_2, \frac{1}{2}r_M$ | $D_1C_2, \frac{1}{2}r_M$ | $D_1D_2, \frac{1}{2}(1-r_M)$ |
| $A_1A_2, \frac{1}{2}(1-r_F)$                            | $\frac{1}{4}(1-r_F)(1-r_M)$                           | $\frac{1}{4}(1-r_F)r_M$  | $\frac{1}{4}(1-r_F)r_M$  | $\frac{1}{4}(1-r_F)(1-r_M)$  |
| $A_1B_2, \frac{1}{2}r_F$                                | $\frac{1}{4}r_F(1-r_M)$                               | $\frac{1}{4}r_Fr_M$      | $\frac{1}{4}r_Fr_M$      | $\frac{1}{4}r_F(1-r_M)$      |
| $B_1A_2, \frac{1}{2}r_F$                                | $\frac{1}{4}r_F(1-r_M)$                               | $\frac{1}{4}r_Fr_M$      | $\frac{1}{4}r_Fr_M$      | $\frac{1}{4}r_F(1-r_M)$      |
| $B_1B_2, \frac{1}{2}(1-r_F)$                            | $\frac{1}{4}(1-r_F)(1-r_M)$                           | $\frac{1}{4}(1-r_F)r_M$  | $\frac{1}{4}(1-r_F)r_M$  | $\frac{1}{4}(1-r_F)(1-r_M)$  |
