# Supplementary material for: Linkage Analysis and Map Construction in Genetic Populations of Clonal F1 and Double Cross
Source: PubMed Central journal article supplement (PMC4349096; doi:10.1534/g3.114.016022), 2015-01-15
Supplement: supp_g3.114.016022_TableS2.pdf [file supp_g3.114.016022_TableS2.pdf]

**Table S2 Theoretical frequencies of the twelve identifiable genotypes in the double cross population for**

**Scenario 10.**  $A_1, B_1, C_1$  and  $D_1$  are the four alleles at locus 1.  $A_2$  and  $B_2$  are the two alleles at locus 2.

Recombination frequencies in the female and male parents are denoted as  $r_F$  and  $r_M$ , respectively. The combined recombination frequency is denoted as  $r$ . The last column gives the symbol of observed sample size of each genotype.

| Genotype | Locus 1  | Locus 2  | Frequency                                       | Combined recombination frequency | Sample size |
|----------|----------|----------|-------------------------------------------------|----------------------------------|-------------|
| 1        | $A_1C_1$ | $A_2A_2$ | $\frac{1}{4}(1-r_F)r_M$                         | $\frac{1}{4}r(1-r)$              | $n_1$       |
| 2        | $A_1C_1$ | $A_2B_2$ | $\frac{1}{4}(1-r_F)(1-r_M) + \frac{1}{4}r_Fr_M$ | $\frac{1}{4}(1-2r+2r^2)$         | $n_2$       |
| 3        | $A_1C_1$ | $B_2B_2$ | $\frac{1}{4}r_F(1-r_M)$                         | $\frac{1}{4}r(1-r)$              | $n_3$       |
| 4        | $A_1D_1$ | $A_2A_2$ | $\frac{1}{4}(1-r_F)(1-r_M)$                     | $\frac{1}{4}(1-r)^2$             | $n_4$       |
| 5        | $A_1D_1$ | $A_2B_2$ | $\frac{1}{4}(1-r_F)r_M + \frac{1}{4}r_F(1-r_M)$ | $\frac{1}{2}r(1-r)$              | $n_5$       |
| 6        | $A_1D_1$ | $B_2B_2$ | $\frac{1}{4}r_Fr_M$                             | $\frac{1}{4}r^2$                 | $n_6$       |
| 7        | $B_1C_1$ | $A_2A_2$ | $\frac{1}{4}r_Fr_M$                             | $\frac{1}{4}r^2$                 | $n_7$       |
| 8        | $B_1C_1$ | $A_2B_2$ | $\frac{1}{4}(1-r_F)r_M + \frac{1}{4}r_F(1-r_M)$ | $\frac{1}{2}r(1-r)$              | $n_8$       |
| 9        | $B_1C_1$ | $B_2B_2$ | $\frac{1}{4}(1-r_F)(1-r_M)$                     | $\frac{1}{4}(1-r)^2$             | $n_9$       |
| 10       | $B_1D_1$ | $A_2A_2$ | $\frac{1}{4}r_F(1-r_M)$                         | $\frac{1}{4}r(1-r)$              | $n_{10}$    |
| 11       | $B_1D_1$ | $A_2B_2$ | $\frac{1}{4}(1-r_F)(1-r_M) + \frac{1}{4}r_Fr_M$ | $\frac{1}{4}(1-2r+2r^2)$         | $n_{11}$    |
| 12       | $B_1D_1$ | $B_2B_2$ | $\frac{1}{4}(1-r_F)r_M$                         | $\frac{1}{4}r(1-r)$              | $n_{12}$    |
