# Supplementary material for: Linkage Analysis and Map Construction in Genetic Populations of Clonal F1 and Double Cross
Source: PubMed Central journal article supplement (PMC4349096; doi:10.1534/g3.114.016022), 2015-01-15
Supplement: supp_g3.114.016022_TableS3.pdf [file supp_g3.114.016022_TableS3.pdf]

**Table S3 Theoretical frequencies of the six identifiable genotypes in the double cross population for Scenarios 11 and 12.** For Scenario 11,  $X_1$  ( $=A_1$  or  $B_1$ ),  $C_1$  and  $D_1$  are the three alleles at locus 1;  $A_2$  and  $B_2$  are the two alleles at locus 2. For Scenario 12,  $A_1$ ,  $B_1$ ,  $X_1$  ( $=C_1$  or  $D_1$ ) are the three alleles at locus 1;  $A_2$  and  $B_2$  are the two alleles at locus 2. Recombination frequencies in the female and male parents are denoted as  $r_F$  and  $r_M$ , respectively. The last column gives the symbol of observed sample size of each genotype.

| Genotype | Locus 1     |             | Locus 2  | Frequency            |                      | Sample size |
|----------|-------------|-------------|----------|----------------------|----------------------|-------------|
|          | Scenario 11 | Scenario 12 |          | Scenario 11          | Scenario 12          |             |
| 1        | $X_1C_1$    | $A_1X_1$    | $A_2A_2$ | $\frac{1}{4}r_M$     | $\frac{1}{4}(1-r_F)$ | $n_1$       |
| 2        | $X_1C_1$    | $A_1X_1$    | $A_2B_2$ | $\frac{1}{4}$        | $\frac{1}{4}$        | $n_2$       |
| 3        | $X_1C_1$    | $A_1X_1$    | $B_2B_2$ | $\frac{1}{4}(1-r_M)$ | $\frac{1}{4}r_F$     | $n_3$       |
| 4        | $X_1D_1$    | $B_1X_1$    | $A_2A_2$ | $\frac{1}{4}(1-r_M)$ | $\frac{1}{4}r_F$     | $n_4$       |
| 5        | $X_1D_1$    | $B_1X_1$    | $A_2B_2$ | $\frac{1}{4}$        | $\frac{1}{4}$        | $n_5$       |
| 6        | $X_1D_1$    | $B_1X_1$    | $B_2B_2$ | $\frac{1}{4}r_M$     | $\frac{1}{4}(1-r_F)$ | $n_6$       |
