# Supplementary material for: Linkage Analysis and Map Construction in Genetic Populations of Clonal F1 and Double Cross
Source: PubMed Central journal article supplement (PMC4349096; doi:10.1534/g3.114.016022), 2015-01-15
Supplement: supp_g3.114.016022_TableS4.pdf [file supp_g3.114.016022_TableS4.pdf]

**Table S4 Theoretical frequencies of the nine identifiable genotypes in the double cross population for Scenario 13 and 14.**  $A_1$  and  $B_1$  are the two alleles at locus 1;  $A_2$  and  $B_2$  are the two alleles at locus 2. The combined recombination frequency is denoted as  $r$ . The last column gives the symbol of observed sample size of each genotype.

| Genotype | Locus 1  | Locus 2  | Expected frequency       |                          | Sample size |
|----------|----------|----------|--------------------------|--------------------------|-------------|
|          |          |          | Scenario 13              | Scenario 14              |             |
| 1        | $A_1A_1$ | $A_2A_2$ | $\frac{1}{4}r(1-r)$      | $\frac{1}{4}(1-r)^2$     | $n_1$       |
| 2        | $A_1A_1$ | $A_2B_2$ | $\frac{1}{4}(1-2r+2r^2)$ | $\frac{1}{2}r(1-r)$      | $n_2$       |
| 3        | $A_1A_1$ | $B_2B_2$ | $\frac{1}{4}r(1-r)$      | $\frac{1}{4}r^2$         | $n_3$       |
| 4        | $A_1B_1$ | $A_2A_2$ | $\frac{1}{4}(1-2r+2r^2)$ | $\frac{1}{2}r(1-r)$      | $n_4$       |
| 5        | $A_1B_1$ | $A_2B_2$ | $r(1-r)$                 | $\frac{1}{2}(1-2r+2r^2)$ | $n_5$       |
| 6        | $A_1B_1$ | $B_2B_2$ | $\frac{1}{4}(1-2r+2r^2)$ | $\frac{1}{2}r(1-r)$      | $n_6$       |
| 7        | $B_1B_1$ | $A_2A_2$ | $\frac{1}{4}r(1-r)$      | $\frac{1}{4}r^2$         | $n_7$       |
| 8        | $B_1B_1$ | $A_2B_2$ | $\frac{1}{4}(1-2r+2r^2)$ | $\frac{1}{2}r(1-r)$      | $n_8$       |
| 9        | $B_1B_1$ | $B_2B_2$ | $\frac{1}{4}r(1-r)$      | $\frac{1}{4}(1-r)^2$     | $n_9$       |
