# Supplementary material for: Linkage Analysis and Map Construction in Genetic Populations of Clonal F1 and Double Cross
Source: PubMed Central journal article supplement (PMC4349096; doi:10.1534/g3.114.016022), 2015-01-15
Supplement: supp_g3.114.016022_TableS5.pdf [file supp_g3.114.016022_TableS5.pdf]

**Table S5 Combined recombination frequencies between 20 markers in a simulated clonal F<sub>1</sub> population.** The upper triangular was theoretical recombination frequencies, and the lower triangular matrix was estimated recombination frequencies.

| Category | Marker | 1    | 2    | 3    | 4    | 5    | 6    | 7    | 8    | 9    | 10   | 11   | 12   | 13   | 14   | 15   | 16   | 17   | 18   | 19   | 20   |
|----------|--------|------|------|------|------|------|------|------|------|------|------|------|------|------|------|------|------|------|------|------|------|
| II       | 1      |      | 0.05 | 0.10 | 0.14 | 0.17 | 0.20 | 0.23 | 0.26 | 0.28 | 0.31 | 0.33 | 0.34 | 0.36 | 0.37 | 0.39 | 0.40 | 0.41 | 0.42 | 0.42 | 0.43 |
| II       | 2      | 0.05 |      | 0.05 | 0.10 | 0.14 | 0.17 | 0.20 | 0.23 | 0.26 | 0.28 | 0.31 | 0.33 | 0.34 | 0.36 | 0.37 | 0.39 | 0.40 | 0.41 | 0.42 | 0.42 |
| IV       | 3      | 0.06 | 0.04 |      | 0.05 | 0.10 | 0.14 | 0.17 | 0.20 | 0.23 | 0.26 | 0.28 | 0.31 | 0.33 | 0.34 | 0.36 | 0.37 | 0.39 | 0.40 | 0.41 | 0.42 |
| III      | 4      |      |      | 0.08 |      | 0.05 | 0.10 | 0.14 | 0.17 | 0.20 | 0.23 | 0.26 | 0.28 | 0.31 | 0.33 | 0.34 | 0.36 | 0.37 | 0.39 | 0.40 | 0.41 |
| III      | 5      |      |      | 0.11 | 0.03 |      | 0.05 | 0.10 | 0.14 | 0.17 | 0.20 | 0.23 | 0.26 | 0.28 | 0.31 | 0.33 | 0.34 | 0.36 | 0.37 | 0.39 | 0.40 |
| IV       | 6      | 0.18 | 0.17 | 0.13 | 0.08 | 0.05 |      | 0.05 | 0.10 | 0.14 | 0.17 | 0.20 | 0.23 | 0.26 | 0.28 | 0.31 | 0.33 | 0.34 | 0.36 | 0.37 | 0.39 |
| III      | 7      |      |      | 0.19 | 0.14 | 0.12 | 0.03 |      | 0.05 | 0.10 | 0.14 | 0.17 | 0.20 | 0.23 | 0.26 | 0.28 | 0.31 | 0.33 | 0.34 | 0.36 | 0.37 |
| I        | 8      | 0.22 | 0.21 | 0.18 | 0.16 | 0.14 | 0.09 | 0.04 |      | 0.05 | 0.10 | 0.14 | 0.17 | 0.20 | 0.23 | 0.26 | 0.28 | 0.31 | 0.33 | 0.34 | 0.36 |
| III      | 9      |      |      | 0.20 | 0.17 | 0.15 | 0.06 | 0.06 | 0.03 |      | 0.05 | 0.10 | 0.14 | 0.17 | 0.20 | 0.23 | 0.26 | 0.28 | 0.31 | 0.33 | 0.34 |
| IV       | 10     | 0.26 | 0.23 | 0.23 | 0.20 | 0.18 | 0.16 | 0.08 | 0.09 | 0.05 |      | 0.05 | 0.10 | 0.14 | 0.17 | 0.20 | 0.23 | 0.26 | 0.28 | 0.31 | 0.33 |
| I        | 11     | 0.31 | 0.30 | 0.26 | 0.24 | 0.22 | 0.18 | 0.13 | 0.12 | 0.08 | 0.05 |      | 0.05 | 0.10 | 0.14 | 0.17 | 0.20 | 0.23 | 0.26 | 0.28 | 0.31 |
| IV       | 12     | 0.31 | 0.28 | 0.29 | 0.24 | 0.20 | 0.20 | 0.15 | 0.13 | 0.13 | 0.08 | 0.04 |      | 0.05 | 0.10 | 0.14 | 0.17 | 0.20 | 0.23 | 0.26 | 0.28 |
| II       | 13     | 0.36 | 0.35 | 0.26 |      |      | 0.22 |      | 0.20 |      | 0.13 | 0.07 | 0.04 |      | 0.05 | 0.10 | 0.14 | 0.17 | 0.20 | 0.23 | 0.26 |
| I        | 14     | 0.39 | 0.38 | 0.34 | 0.31 | 0.30 | 0.26 | 0.23 | 0.23 | 0.20 | 0.18 | 0.13 | 0.10 | 0.04 |      | 0.05 | 0.10 | 0.14 | 0.17 | 0.20 | 0.23 |
| II       | 15     | 0.41 | 0.39 | 0.34 |      |      | 0.27 |      | 0.27 |      | 0.23 | 0.18 | 0.16 | 0.11 | 0.08 |      | 0.05 | 0.10 | 0.14 | 0.17 | 0.20 |
| IV       | 16     | 0.45 | 0.44 | 0.39 | 0.38 | 0.37 | 0.30 | 0.25 | 0.28 | 0.24 | 0.26 | 0.21 | 0.17 | 0.15 | 0.09 | 0.06 |      | 0.05 | 0.10 | 0.14 | 0.17 |
| I        | 17     | 0.44 | 0.42 | 0.40 | 0.36 | 0.35 | 0.34 | 0.28 | 0.30 | 0.26 | 0.29 | 0.26 | 0.22 | 0.22 | 0.15 | 0.13 | 0.07 |      | 0.05 | 0.10 | 0.14 |
| III      | 18     |      |      | 0.37 | 0.35 | 0.34 | 0.30 | 0.27 | 0.27 | 0.26 | 0.26 | 0.24 | 0.20 |      | 0.09 |      | 0.05 | 0.04 |      | 0.05 | 0.10 |
| I        | 19     | 0.48 | 0.46 | 0.45 | 0.37 | 0.36 | 0.37 | 0.31 | 0.35 | 0.30 | 0.34 | 0.31 | 0.29 | 0.32 | 0.23 | 0.25 | 0.17 | 0.12 | 0.07 |      | 0.05 |
| II       | 20     | 0.49 | 0.47 | 0.48 |      |      | 0.41 |      | 0.42 |      | 0.36 | 0.35 | 0.29 | 0.32 | 0.32 | 0.26 | 0.23 | 0.17 |      | 0.08 |      |
