# Supplementary material for: Linkage Analysis and Map Construction in Genetic Populations of Clonal F1 and Double Cross
Source: PubMed Central journal article supplement (PMC4349096; doi:10.1534/g3.114.016022), 2015-01-15
Supplement: supp_g3.114.016022_TableS6.pdf [file supp_g3.114.016022_TableS6.pdf]

**Table S6** Distance between the two markers (the upper triangular matrix) and LOD scores for detecting linkage (the lower triangular matrix) in the simulated clonal F<sub>1</sub> population. The distance was calculated using Haldane mapping function.

| Category | Marker | 1    | 2    | 3    | 4    | 5    | 6    | 7    | 8    | 9    | 10   | 11   | 12   | 13   | 14   | 15   | 16    | 17    | 18   | 19    | 20    |
|----------|--------|------|------|------|------|------|------|------|------|------|------|------|------|------|------|------|-------|-------|------|-------|-------|
| II       | 1      |      | 5.3  | 6.5  |      |      | 22.6 |      | 29.0 |      | 37.4 | 47.1 | 48.9 | 61.9 | 73.5 | 83.0 | 116.1 | 102.0 |      | 160.9 | 175.3 |
| II       | 2      | 43.0 |      | 4.2  |      |      | 20.8 |      | 27.2 |      | 31.1 | 44.6 | 41.0 | 58.6 | 69.3 | 73.5 | 107.0 | 88.6  |      | 126.3 | 133.0 |
| IV       | 3      | 20.0 | 22.5 |      | 8.8  | 12.6 | 14.6 | 24.2 | 21.7 | 25.9 | 30.1 | 35.7 | 42.9 | 37.2 | 58.0 | 58.1 | 76.4  | 79.2  | 68.8 | 111.9 | 174.8 |
| III      | 4      |      |      | 17.7 |      | 2.6  | 8.7  | 16.4 | 19.3 | 20.8 | 25.5 | 32.7 | 32.0 |      | 48.4 |      | 72.3  | 63.6  | 60.2 | 67.4  |       |
| III      | 5      |      |      | 14.8 | 50.1 |      | 4.8  | 13.1 | 15.7 | 17.1 | 22.2 | 28.1 | 26.3 |      | 44.6 |      | 68.3  | 58.6  | 55.4 | 61.9  |       |
| IV       | 6      | 8.4  | 9.0  | 32.4 | 15.9 | 19.4 |      | 3.5  | 10.2 | 6.0  | 20.0 | 21.8 | 26.2 | 28.3 | 36.9 | 39.4 | 46.8  | 55.8  | 44.7 | 66.0  | 85.2  |
| III      | 7      |      |      | 8.8  | 25.0 | 29.2 | 20.8 |      | 4.2  | 6.4  | 9.2  | 15.1 | 17.9 |      | 30.8 |      | 35.6  | 41.0  | 38.8 | 48.4  |       |
| I        | 8      | 14.4 | 15.6 | 23.0 | 22.0 | 25.8 | 42.0 | 45.6 |      | 3.1  | 9.8  | 14.1 | 15.7 | 24.7 | 30.3 | 37.8 | 40.4  | 45.2  | 38.8 | 60.2  | 88.6  |
| III      | 9      |      |      | 8.2  | 20.6 | 24.3 | 18.2 | 40.5 | 48.5 |      | 5.6  | 8.7  | 14.9 |      | 25.5 |      | 31.8  | 36.7  | 36.7 | 45.8  |       |
| IV       | 10     | 4.8  | 6.3  | 4.0  | 8.0  | 9.2  | 9.1  | 16.7 | 44.4 | 20.1 |      | 5.1  | 9.2  | 14.6 | 22.2 | 31.1 | 36.7  | 43.0  | 37.4 | 56.7  | 62.9  |
| I        | 11     | 6.8  | 7.5  | 12.4 | 12.3 | 15.0 | 22.5 | 26.6 | 56.2 | 36.0 | 58.8 |      | 4.0  | 7.5  | 15.1 | 22.3 | 26.5  | 36.7  | 32.7 | 49.0  | 60.2  |
| IV       | 12     | 2.9  | 4.1  | 1.4  | 5.9  | 7.6  | 5.4  | 10.9 | 31.7 | 12.5 | 0.0  | 63.6 |      | 4.5  | 10.8 | 19.5 | 21.1  | 29.5  | 26.3 | 43.4  | 43.5  |
| II       | 13     | 3.7  | 4.2  | 5.1  |      |      | 6.6  |      | 17.4 |      | 13.0 | 38.2 | 20.8 |      | 4.2  | 12.4 | 17.4  | 29.0  |      | 49.7  | 51.1  |
| I        | 14     | 2.3  | 2.7  | 4.9  | 6.4  | 7.5  | 10.9 | 13.4 | 27.3 | 16.7 | 22.4 | 53.6 | 41.1 | 45.6 |      | 8.7  | 9.8   | 17.1  | 9.9  | 30.3  | 51.1  |
| II       | 15     | 1.6  | 2.3  | 2.1  |      |      | 4.1  |      | 10.0 |      | 6.3  | 19.3 | 10.2 | 30.1 | 36.0 |      | 6.3   | 15.1  |      | 33.7  | 36.7  |
| IV       | 16     | 0.2  | 0.3  | 0.0  | 1.2  | 1.5  | 0.0  | 5.6  | 9.7  | 6.5  | 2.3  | 19.0 | 8.3  | 12.2 | 47.0 | 20.8 |       | 7.2   | 5.2  | 20.2  | 30.0  |
| I        | 17     | 0.7  | 1.3  | 1.8  | 3.5  | 4.2  | 4.7  | 8.7  | 14.8 | 10.4 | 8.9  | 21.0 | 15.9 | 14.4 | 50.7 | 26.6 | 53.0  |       | 4.2  | 13.4  | 20.8  |
| III      | 18     |      |      | 1.4  | 4.0  | 4.8  | 3.3  | 9.5  | 9.5  | 10.4 | 4.8  | 12.3 | 7.6  |      | 33.9 |      | 22.0  | 45.6  |      | 7.5   |       |
| I        | 19     | 0.1  | 0.3  | 1.0  | 3.0  | 3.7  | 3.5  | 6.4  | 8.6  | 7.2  | 5.0  | 13.0 | 8.9  | 6.1  | 30.3 | 11.9 | 26.5  | 57.6  | 38.2 |       | 8.1   |
| II       | 20     | 0.0  | 0.2  | 0.0  |      |      | 0.6  |      | 1.3  |      | 1.7  | 4.0  | 3.7  | 5.8  | 5.8  | 10.4 | 7.1   | 20.6  |      | 37.1  |       |
