# Supplementary material for: Linkage Analysis and Map Construction in Genetic Populations of Clonal F1 and Double Cross
Source: PubMed Central journal article supplement (PMC4349096; doi:10.1534/g3.114.016022), 2015-01-15
Supplement: supp_g3.114.016022_TableS7.pdf [file supp_g3.114.016022_TableS7.pdf]

**Table S7** General information of the combined linkage maps of the two simulated populations with 20 markers built by GACD, JoinMap4.1, OneMap and R/qtl.

| Software             | Order                                                                 | Length (cM) | Time (s) |
|----------------------|-----------------------------------------------------------------------|-------------|----------|
| Original population  |                                                                       |             |          |
| GACD                 | 1, 2, 3, 4, 5, 6, 7, 8, 9, 10, 11, 12, 13, 14, 15, 16, 17, 18, 19, 20 | 101.79      | 10       |
| JoinMap4.1           | 12, 8, 5, 3, 4, 6, 7, 9, 14, 15, 20, 1, 2, 10, 11, 13, 17, 19, 16, 18 | 15211.04    | 33       |
| OneMap               | 1, 2, 3, 4, 5, 6, 7, 8, 9, 10, 11, 12, 13, 14, 15, 16, 17, 18, 19, 20 | 103.83      | 455      |
| R/qtl                | 1, 2, 3, 4, 5, 6, 7, 8, 9, 10, 11, 12, 13, 14, 15, 16, 17, 18, 19, 20 | 104.22      | 63       |
| Distorted population |                                                                       |             |          |
| GACD                 | 1, 2, 3, 4, 5, 6, 7, 8, 9, 10, 11, 12, 13, 14, 15, 16, 17, 18, 19, 20 | 104.14      | 8        |
| JoinMap4.1           | 12, 8, 5, 3, 4, 6, 7, 9, 14, 15, 20, 1, 2, 10, 11, 13, 17, 19, 16, 18 | 15203.82    | 45       |
| OneMap               | 1, 2, 3, 4, 5, 6, 7, 8, 9, 10, 11, 12, 13, 14, 15, 16, 17, 18, 19, 20 | 102.92      | 334      |
| R/qtl                | 1, 2, 3, 4, 5, 6, 7, 8, 9, 10, 11, 12, 13, 14, 15, 16, 17, 18, 19, 20 | 104.38      | 56       |
