# Supplementary material for: Linkage Analysis and Map Construction in Genetic Populations of Clonal F1 and Double Cross
Source: PubMed Central journal article supplement (PMC4349096; doi:10.1534/g3.114.016022), 2015-01-15
Supplement: supp_g3.114.016022_TableS8.pdf [file supp_g3.114.016022_TableS8.pdf]

**Table S8** General information of the combined linkage maps of the simulated population with 200 individuals and 200 markers built by GACD, JoinMap4.1, OneMap and R/qtl.

| Software   | No. of unlinked markers | No. of linked markers in correct order | First marker | Last marker | Length (cM) | Time (min) |
|------------|-------------------------|----------------------------------------|--------------|-------------|-------------|------------|
| GACD       | 0                       | 200                                    | Marker1      | Marker200   | 199.28      | 0.5        |
| JoinMap4.1 | 5                       | 195                                    | Marker1      | Marker200   | 198.62      | 5          |
| OneMap     | 24                      | 176                                    | Marker1      | Marker198   | 198.18      | 537        |
| R/qtl      | - <sup>a</sup>          | -                                      | -            | -           | -           | -          |

<sup>a</sup> R/qtl cannot give results for this population
